# Supplementary material for: The Virion Host Shut-Off (vhs) Protein Blocks a TLR-Independent Pathway of Herpes Simplex Virus Type 1 Recognition in Human and Mouse Dendritic Cells
Source: PubMed Central journal article supplement (PMC2823768; doi:10.1371/journal.pone.0008684), 2010-02-18

# Supplementary Figure #1

**A**

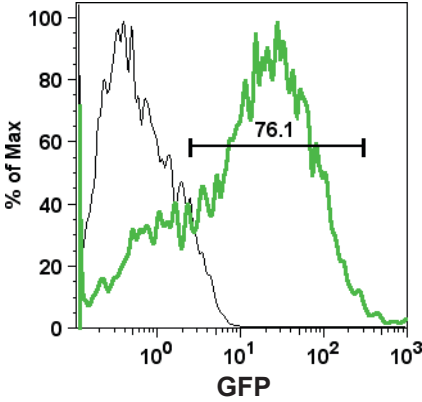

**B**

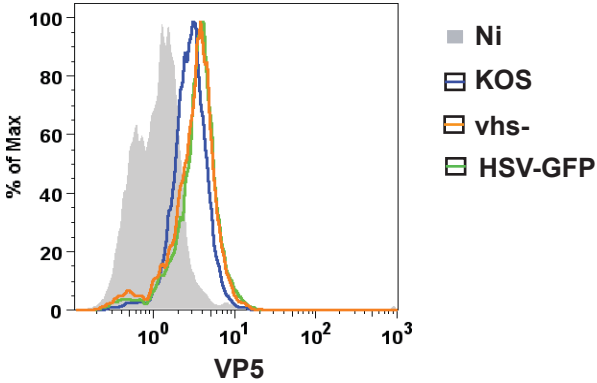

**C**

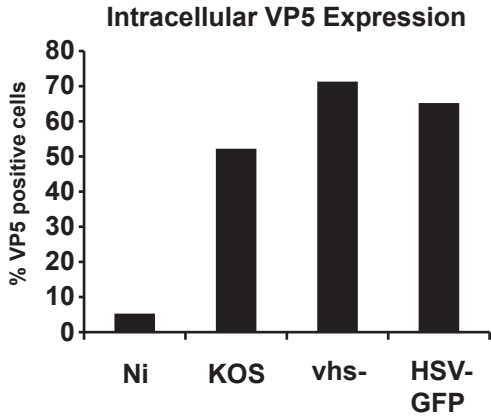

Supplement: pone.0008684.s001.pdf [file pone.0008684.s001.pdf]
